# Supplementary material
Source: HighWire-hosted journal article supplement (https://bmjopen.bmj.com/content/10/1/e034400)
Supplement: inline-supplementary-material-1 [file inline-supplementary-material-1.pdf]

## Appendix 1

| PCC          | Term                                | Keywords                                                                                                                                                                                                                                                                                                                                                                                                                                                                                                                                                                                                                                                                                                                            | MeSH                                                                                                    |
|--------------|-------------------------------------|-------------------------------------------------------------------------------------------------------------------------------------------------------------------------------------------------------------------------------------------------------------------------------------------------------------------------------------------------------------------------------------------------------------------------------------------------------------------------------------------------------------------------------------------------------------------------------------------------------------------------------------------------------------------------------------------------------------------------------------|---------------------------------------------------------------------------------------------------------|
| Participants | NA                                  | -                                                                                                                                                                                                                                                                                                                                                                                                                                                                                                                                                                                                                                                                                                                                   | -                                                                                                       |
| Concept      | Health workers / health occupations | ((Health*) adj1 (Practitioner* or Profession* or Worker* or Occupations or Staff or Employee or Carer)) or ((Allied Health) adj1 (personnel or profession*)) or Medic* Practitioner* or Chiropract* or Dental Practitioner* or Dentist* or Medical Radiation Practitioner* or Nurs* or Midwi* or Occupational Therap* or Optometr* or Osteopath* or Paramedic* or Pharmac* or Physiotherap* or Podiatr* or Psycholog* or Audiolog* or Counsel?or* or counsel?ing or Dietician* or Dietetic* or Orthot* or Prostheti* or Massage Therap* or Speech Patholog* or Speech Therap* or Sonograph* or Social Work* or Care?giver* or Dental Assistant* or Dental Technician* or Doctor* or General Practitioner* or Surgeon* or Physician* | exp health occupations/<br>exp health personnel/<br>exp complementary therapies/<br>exp social workers/ |
|              | Workforce                           | staff* ratio? or provider?-population? ratio? or population?-provider? ratio? or patient?-provider? ratio? or provider?-patient ratio? or workforce or manpower or man power or womanpower or woman power or staffing or labo?r supply* or labo?r supplies or human resourc*                                                                                                                                                                                                                                                                                                                                                                                                                                                        | exp workforce/                                                                                          |
|              | Data planning                       | plan or planning or plans or planned                                                                                                                                                                                                                                                                                                                                                                                                                                                                                                                                                                                                                                                                                                | Data Collection/<br>Datasets as topic/<br>Statistics as topic/                                          |

|                |           |                                                                                                                                                                                                                                                            |                                                                                                                                                            |
|----------------|-----------|------------------------------------------------------------------------------------------------------------------------------------------------------------------------------------------------------------------------------------------------------------|------------------------------------------------------------------------------------------------------------------------------------------------------------|
|                |           |                                                                                                                                                                                                                                                            | Dataset/<br>“Information storage<br>and retrieval”/<br>sn.fs. (Statistics and<br>Numerical Data)<br>exp health planning/<br>Health Information<br>Systems/ |
| <b>Context</b> | Australia | Austral* or Australian Capital Territory or<br>New South Wales or Northern Territory or<br>Queensland or South Australia or Tasmania or<br>Victoria or Western Australia or Sydney or<br>Melbourne or Canberra or Perth or Brisbane or<br>Hobart or Darwin | exp Australia/                                                                                                                                             |
| <b>Limits</b>  | Year      | 2000 – Current                                                                                                                                                                                                                                             |                                                                                                                                                            |
